# Supplementary material for: Catalyst-free iodine-mediated living radical polymerization under irradiation over a wide visible-light spectral scope
Source: Royal Society of Chemistry journal article supplement (doi:10.1039/c6py00444j), 2016-01-01
Supplement: c6py00444j1.pdf [file c6py00444j1.pdf]

## Supplementary Information

For

# Catalyst-free Iodine-Mediated Living Radical Polymerization under Irradiation over a Wide Visible-Light Spectral Scope

Xiaodong Liu, Lifen Zhang,\* Zhenping Cheng\* and Xiulin Zhu

*Suzhou key Laboratory of Macromolecular Design and Precision Synthesis, Jiangsu Key Laboratory of Advanced Functional Polymer Design and Application, Department of Polymer Science and Engineering, College of Chemistry, Chemical Engineering and Materials Science, Soochow University, Suzhou 215123, China.*

**Table S1. Photo-induced catalyst-free LRP of MMA under white or green LED irradiation.<sup>a</sup>**

| Entry | Light source | [M] <sub>0</sub> /[I] <sub>0</sub> | Solvent | Solvent volume | Time (h) | Conv. <sup>b</sup> (%) | $M_{n,th}^c$ (g/mol) | $M_{n,GPC}^d$ (g/mol) | $M_w/M_n^d$ |
|-------|--------------|------------------------------------|---------|----------------|----------|------------------------|----------------------|-----------------------|-------------|
| 1     | White LED    | 100/1                              | DMSO    | 1.0            | 9        | 51.3                   | 5330                 | 4800                  | 1.20        |
| 2     | Green LED    | 100/1                              | DMSO    | 1.0            | 15       | 74.7                   | 7670                 | 8360                  | 1.13        |
| 3     | Green LED    | 100/1                              | DMAC    | 0.2            | 12       | 47.9                   | 4990                 | 5100                  | 1.12        |
| 4     | Green LED    | 100/1                              | DMAC    | 0.5            | 12       | 58.6                   | 6060                 | 6560                  | 1.12        |
| 5     | Green LED    | 100/1                              | DMAC    | 1.0            | 12       | 64.6                   | 6660                 | 6690                  | 1.10        |
| 6     | Green LED    | 100/1                              | DMAC    | 1.5            | 12       | 57.5                   | 5950                 | 6450                  | 1.14        |
| 7     | Green LED    | 100/1                              | DMAC    | 2.0            | 12       | 57.0                   | 5900                 | 5970                  | 1.17        |
| 8     | Green LED    | 600/1                              | DMAC    | 1.0            | 52       | 47.6                   | 28790                | 40220                 | 1.07        |
| 9     | Green LED    | 800/1                              | DMAC    | 1.0            | 68       | 44.8                   | 36080                | 43690                 | 1.09        |
| 10    | White LED    | 600/1                              | DMSO    | 1.0            | 20       | 52.5                   | 31730                | 55850                 | 1.26        |
| 11    | White LED    | 800/1                              | DMAC    | 1.0            | 20       | 46.5                   | 37440                | 61250                 | 1.34        |

<sup>a</sup>Reaction conditions: [MMA]<sub>0</sub>:[CP-I]<sub>0</sub> = 100:1, 600:1 or 800:1,  $V_{MMA}$  = 1.0 mL, at room temperature irradiation by LED light.

<sup>b</sup>Determined by gravimetry. <sup>c</sup>Calculated based on monomer conversion,  $M_{n,th} = M_{CP-I} + [MMA]_0/[CP-I]_0 \times M_{MMA} \times \text{conversion}\%$ .

<sup>d</sup>Determined by GPC in THF, based on linear PMMA as calibration standards.

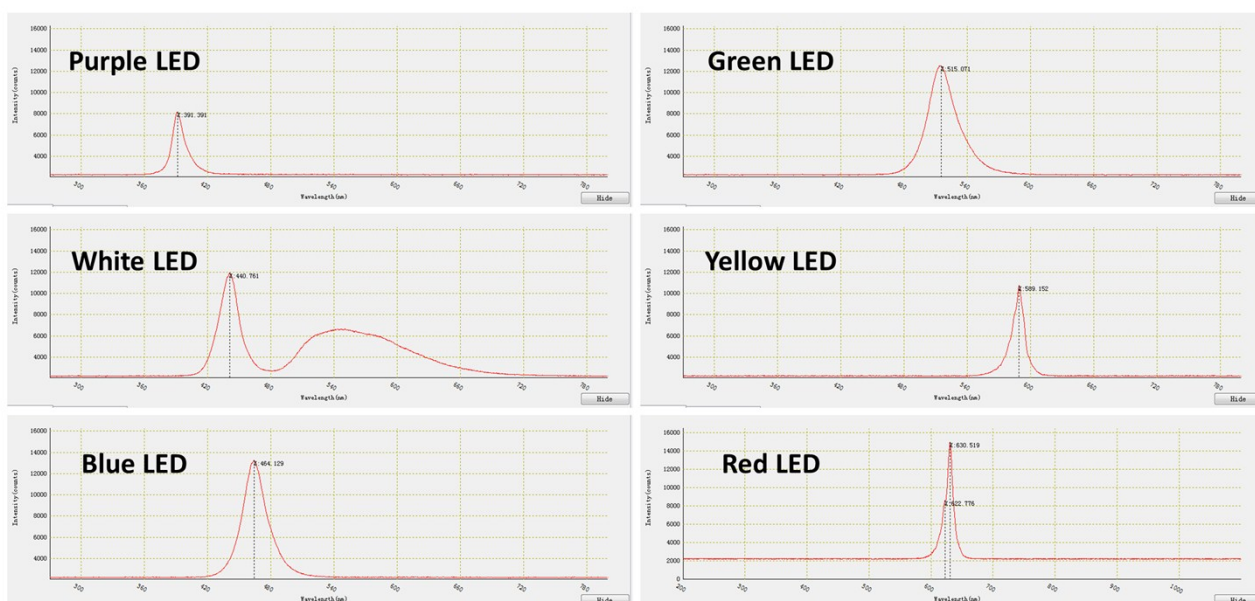

**Fig. S1** Emission spectra of LEDs. The peaks are  $390 \pm 30$  nm for the purple LED,  $464 \pm 40$  nm for the blue LED,  $515 \pm 40$  nm for the green LED,  $590 \pm 20$  nm for the yellow LED and  $630 \pm 30$  nm for the red LED with the breadths of the distribution are given by half of the full width at half maximum. The emission wavelength for the white LED was 400-720 nm,  $\lambda_{\max} = 440, 540$  nm. The emission intensities changes with the variation of distance of the light source to the inductive sensor.

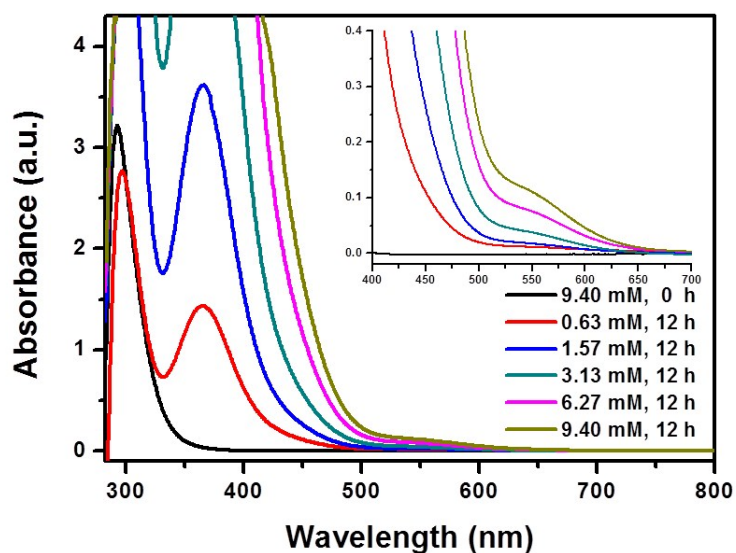

**Fig. S2** UV-Vis absorption spectra of polymerization systems in DMAC before and after polymerization under red LED irradiation for 12h; the polymerization systems were diluted with DMAC and calculated by original initiator concentration before measurement.
